# Supplementary material for: Effects of Different Therapeutic Schedules on Patients with COVID-19: A Prospective Case–Control Study in China
Source: Hindawi journal article supplement (doi:10.1155/2022/7009876), 2022-06-21
Supplement: f1 [file 7009876.f1.docx]

**Table S1. Clinical classifications**

| **Type** | **Criteria** |
| --- | --- |
| Mild | light clinical symptoms, and no sign of pneumonia on imaging |
| Moderate | fever, respiratory tract and other symptoms, and pneumonia on imaging |
| Severe | coincide with any of the following: (1) respiratory distress, respiration rate ≥ 30 times / min; (2) the oxygen saturation ≤ 93% in the resting state; (3) PaO2 / FiO2 ≤ 300 mmHg. |
| Critically ill | coincide with any of the following: (1) respiratory failure occurs, and require mechanical ventilation; (2) shock occurs; (3) other organ failure develops, and require ICU monitoring and treatment. |

**Table S2 Traditional Chinese medicine prescription for COVID-19**

|  | The initial prescription (No 2) | The mid-term prescription (No 3） |
| --- | --- | --- |
| prescription | ephedra herb 6g  bitter apricot seed 9g  Semen coicis 30g  liquoric root 3g  chinese atractylodes rhizome 9g  officinal magnolia bark 9g  ginger processed pinellia 9g  silkworm droppings 15g  weeping forsythiae capsule 9g  talc 15g  poison yam 12g  cicada slough 6g | talc 30g  capillary wormwood herb 15g  grass leaf sweel flag rhizome 12g  weeping forsythiae capsule 12g  katsumada galangal 9g  baical skullcap root 9g  gypsum 15g  tansymustard seed 12g  perilla leaf 9g  sweet wormwood herb 15g  ginger processed pinellia 9g medicated leaven 15g |
| Adaptive syndrome | Syndrome of spleen deficiency and dampness obstruction | Syndrome of dampness stagnation and heat transformation |
